# Supplementary material for: Nested Human-in-the-Loop AI: A Chain of Code Prompting Framework for Research Tool Development with GenAI
Source: Research Square preprint supplement (doi:10.21203/rs.3.rs-5702366/v1), 2025-08-27
Supplement: Supplementary file 1 [file bc4a142f7e5cd10e1cf5ab0a.docx]

ChatGPT 4o mini

This is a copy of a conversation between ChatGPT & Anonymous.

Report content

**You said:**

Play the role of a software engineer and construct a ‘grey literature retrieval tool’. Use the following steps: 1. Use the programming language Python. 2. Use the link provided to assist in setting up the tool; “https://github.com/serpapi/google-search-results-python.” 3. Use the Libraries ‘OS ,’CSV’, and ‘SerpAPI’. 4. Store the ‘Titles’, ‘Links’, and ‘Snippets’ in a saved CSV file until no further results are found. 5. Save the file in this directory "**Left blank (removed)**". 6. Use this search strategy to gather the grey literature ‘site:.gov.au AND ("energy resilience" OR "energy sustainability") AND (governance) filetype:pdf’. 7. Deconstruct each stage into a separate script, then provide the full script at the end.

**ChatGPT said:**

ChatGPT

Here's a breakdown of each stage in constructing your "Grey Literature Retrieval Tool" in Python. We’ll set up a series of scripts using the SerpAPI for Google Search results, os and csv libraries, and handle saving the results to a CSV file.

**Step 1: Install SerpAPI Library**

Before we begin, install the SerpAPI library via pip if it's not already installed:

!pip install google-search-results

**Stage 1: Set Up the SerpAPI Client**

In this script, we'll set up the SerpAPI client using the credentials from SerpAPI.

from serpapi import GoogleSearch

# Initialize the API with your API key (replace 'YOUR_API_KEY' with your actual API key)

api_key = 'YOUR_API_KEY'

def create_serpapi_client():

params = {

"engine": "google",

"q": 'site:.gov.au AND ("energy resilience" OR "energy sustainability") AND (governance) filetype:pdf',

"api_key": api_key,

"num": 10,

"start": 0 # Starts with the first page

}

return GoogleSearch(params)

**Stage 2: Define a Function to Retrieve and Parse Results**

This function uses the SerpAPI client to fetch results and parse the title, link, and snippet from each result.

import csv

def fetch_results(client, start):

client.params_dict["start"] = start # Update start for pagination

search = client.get_dict()

return search.get("organic_results", [])

**Stage 3: Save Results to CSV File**

This function handles saving the extracted data into a CSV file.

import os

def save_to_csv(data, filepath):

# Check if directory exists; if not, create it

os.makedirs(os.path.dirname(filepath), exist_ok=True)

# Check if file exists to write headers only once

file_exists = os.path.isfile(filepath)

with open(filepath, mode='a', newline='', encoding='utf-8') as file:

writer = csv.writer(file)

if not file_exists:

writer.writerow(['Title', 'Link', 'Snippet'])

for entry in data:

writer.writerow([entry.get('title'), entry.get('link'), entry.get('snippet')])

**Stage 4: Main Script to Retrieve and Save Results Until Exhausted**

This function will iteratively retrieve results until no more are found, saving each batch to the CSV.

def retrieve_and_save_all_results(api_key, filepath):

client = create_serpapi_client() # Initialize the client with the search params

start = 0

all_results = []

while True:

print(f"Fetching results starting from: {start}")

results = fetch_results(client, start)

# Break if no more results are found

if not results:

break

# Save each result with title, link, and snippet

entries = []

for result in results:

title = result.get('title', 'No Title')

link = result.get('link', 'No Link')

snippet = result.get('snippet', 'No Snippet')

entries.append({"title": title, "link": link, "snippet": snippet})

save_to_csv(entries, filepath)

# Increase the start to go to the next page of results

start += 10

print("All results retrieved and saved.")

**Stage 5: Complete Script**

Now, here’s the complete code that combines all stages into one single script. This script will run the entire process from setting up the API client to saving the retrieved results in the specified CSV file.

import os

import csv

from serpapi import GoogleSearch

# Define constants

API_KEY = 'YOUR_API_KEY'

FILEPATH = "**Left blank (removed)**"

# Function to create a SerpAPI client

def create_serpapi_client():

params = {

"engine": "google",

"q": 'site:.gov.au AND ("energy resilience" OR "energy sustainability") AND (governance) filetype:pdf',

"api_key": API_KEY,

"num": 10,

"start": 0 # Start with the first page

}

return GoogleSearch(params)

# Function to fetch results

def fetch_results(client, start):

client.params_dict["start"] = start

search = client.get_dict()

return search.get("organic_results", [])

# Function to save to CSV

def save_to_csv(data, filepath):

os.makedirs(os.path.dirname(filepath), exist_ok=True)

file_exists = os.path.isfile(filepath)

with open(filepath, mode='a', newline='', encoding='utf-8') as file:

writer = csv.writer(file)

if not file_exists:

writer.writerow(['Title', 'Link', 'Snippet'])

for entry in data:

writer.writerow([entry.get('title'), entry.get('link'), entry.get('snippet')])

# Main function to retrieve and save results until no more are found

def retrieve_and_save_all_results():

client = create_serpapi_client()

start = 0

while True:

print(f"Fetching results starting from: {start}")

results = fetch_results(client, start)

if not results:

break

entries = []

for result in results:

title = result.get('title', 'No Title')

link = result.get('link', 'No Link')

snippet = result.get('snippet', 'No Snippet')

entries.append({"title": title, "link": link, "snippet": snippet})

save_to_csv(entries, FILEPATH)

start += 10

print("All results retrieved and saved.")

# Run the tool

retrieve_and_save_all_results()

**Notes**

- Replace 'YOUR_API_KEY' with your actual SerpAPI key.
- Ensure the SerpAPI limits are considered to avoid exceeding the API quota.

**You said:**

Continue in your role and update the search strategy. 1. Include separate searches for the following domains: i. Tasmania (.tas.gov.au), ii. Victoria (.vic.gov.au), iii. New South Whales (.nsw.gov.au) 2. Include the ability to add further searches if required 3. Deconstruct each stage into a separate script, then provide the full script.

**ChatGPT said:**

ChatGPT

To extend the functionality of the grey literature retrieval tool, I’ll modify it to perform separate searches for Tasmania (.tas.gov.au), Victoria (.vic.gov.au), and New South Wales (.nsw.gov.au). This version will allow for the addition of other domains in the future.

**Step 1: Update the Configuration to Handle Multiple Domains**

We’ll use a dictionary to specify each domain, allowing flexibility for future updates.

**Stage 1: Set Up the SerpAPI Client for Multiple Domains**

Here’s the updated create_serpapi_client function, which accepts a domain as a parameter.

from serpapi import GoogleSearch

# Initialize the API with your API key (replace 'YOUR_API_KEY' with your actual API key)

api_key = 'YOUR_API_KEY'

# Define domains for separate searches

domains = {

"Tasmania": "site:.tas.gov.au AND (\"energy resilience\" OR \"energy sustainability\") AND (governance) filetype:pdf",

"Victoria": "site:.vic.gov.au AND (\"energy resilience\" OR \"energy sustainability\") AND (governance) filetype:pdf",

"New South Wales": "site:.nsw.gov.au AND (\"energy resilience\" OR \"energy sustainability\") AND (governance) filetype:pdf"

}

# Function to create a SerpAPI client for each domain

def create_serpapi_client(query):

params = {

"engine": "google",

"q": query,

"api_key": api_key,

"num": 10,

"start": 0 # Starts with the first page

}

return GoogleSearch(params)

**Stage 2: Define a Function to Retrieve and Parse Results**

This function remains mostly the same but will be called with different query parameters based on the domain.

import csv

def fetch_results(client, start):

client.params_dict["start"] = start # Update start for pagination

search = client.get_dict()

return search.get("organic_results", [])

**Stage 3: Save Results to Separate CSV Files for Each Domain**

This function saves results in a directory, creating a CSV file for each domain.

import os

def save_to_csv(data, filepath):

os.makedirs(os.path.dirname(filepath), exist_ok=True)

file_exists = os.path.isfile(filepath)

with open(filepath, mode='a', newline='', encoding='utf-8') as file:

writer = csv.writer(file)

if not file_exists:

writer.writerow(['Title', 'Link', 'Snippet'])

for entry in data:

writer.writerow([entry.get('title'), entry.get('link'), entry.get('snippet')])

**Stage 4: Main Script to Retrieve and Save Results for Each Domain Until Exhausted**

This function will iterate through each domain, retrieve results, and save them to a corresponding CSV file.

def retrieve_and_save_all_results(api_key, domains, base_dir):

for domain_name, query in domains.items():

client = create_serpapi_client(query) # Initialize the client with the search params

start = 0

filepath = os.path.join(base_dir, f"{domain_name}_Grey_Lit_Results.csv")

print(f"Starting retrieval for: {domain_name}")

while True:

print(f"Fetching {domain_name} results starting from: {start}")

results = fetch_results(client, start)

# Break if no more results are found

if not results:

break

# Save each result with title, link, and snippet

entries = []

for result in results:

title = result.get('title', 'No Title')

link = result.get('link', 'No Link')

snippet = result.get('snippet', 'No Snippet')

entries.append({"title": title, "link": link, "snippet": snippet})

save_to_csv(entries, filepath)

start += 10

print(f"Completed retrieval for {domain_name}")

print("All results retrieved and saved.")

**Stage 5: Complete Script**

This is the complete code, combining all stages into a single script to perform the retrieval, parsing, and saving for multiple domains.

import os

import csv

from serpapi import GoogleSearch

# Define constants

API_KEY = 'YOUR_API_KEY'

BASE_DIR = "**Left blank (removed)**"

# Define domains for separate searches

domains = {

"Tasmania": "site:.tas.gov.au AND (\"energy resilience\" OR \"energy sustainability\") AND (governance) filetype:pdf",

"Victoria": "site:.vic.gov.au AND (\"energy resilience\" OR \"energy sustainability\") AND (governance) filetype:pdf",

"New South Wales": "site:.nsw.gov.au AND (\"energy resilience\" OR \"energy sustainability\") AND (governance) filetype:pdf"

}

# Function to create a SerpAPI client for each domain

def create_serpapi_client(query):

params = {

"engine": "google",

"q": query,

"api_key": API_KEY,

"num": 10,

"start": 0 # Start with the first page

}

return GoogleSearch(params)

# Function to fetch results

def fetch_results(client, start):

client.params_dict["start"] = start

search = client.get_dict()

return search.get("organic_results", [])

# Function to save to CSV

def save_to_csv(data, filepath):

os.makedirs(os.path.dirname(filepath), exist_ok=True)

file_exists = os.path.isfile(filepath)

with open(filepath, mode='a', newline='', encoding='utf-8') as file:

writer = csv.writer(file)

if not file_exists:

writer.writerow(['Title', 'Link', 'Snippet'])

for entry in data:

writer.writerow([entry.get('title'), entry.get('link'), entry.get('snippet')])

# Main function to retrieve and save results for each domain

def retrieve_and_save_all_results():

for domain_name, query in domains.items():

client = create_serpapi_client(query)

start = 0

filepath = os.path.join(BASE_DIR, f"{domain_name}_Grey_Lit_Results.csv")

print(f"Starting retrieval for: {domain_name}")

while True:

print(f"Fetching {domain_name} results starting from: {start}")

results = fetch_results(client, start)

if not results:

break

entries = []

for result in results:

title = result.get('title', 'No Title')

link = result.get('link', 'No Link')

snippet = result.get('snippet', 'No Snippet')

entries.append({"title": title, "link": link, "snippet": snippet})

save_to_csv(entries, filepath)

start += 10

print(f"Completed retrieval for {domain_name}")

print("All results retrieved and saved.")

# Run the tool

retrieve_and_save_all_results()

**Notes for Future Expansion**

- To add further domains, simply add additional key-value pairs in the domains dictionary.
- Replace 'YOUR_API_KEY' with the actual SerpAPI key.

**You said:**

Continue in your role and make changes to the Environment Printout: 1. in the environment, print the first two results for each search. 2. Have them print as follows: i. Tas Results (1st 2nd Tas results); Vic Results (1st 2nd Vic Results); NSW Results (1st 2nd NSW results). ii. Ensure that the Title, Link, and Snippet for both results are included iii. Delineate each source with em note dashes 3. Deconstruct each stage into a separate script, then provide the full script.

**ChatGPT said:**

ChatGPT

To modify the environment printout, we'll make the following updates:

1. **Print the first two results for each domain.**
2. **Format the printout to display each domain's results** in the format:
   - Tas Results (1st 2nd Tas results)
   - Vic Results (1st 2nd Vic Results)
   - NSW Results (1st 2nd NSW results)
3. **Include the Title, Link, and Snippet for each result** and **delineate each source with em-dashes**.

**Stage 1: Set Up the SerpAPI Client for Multiple Domains**

The SerpAPI client setup remains the same, except we specify the domains dictionary for the distinct queries.

from serpapi import GoogleSearch

# API Key (Replace with actual API key)

api_key = 'YOUR_API_KEY'

# Define search queries by domain

domains = {

"Tasmania": "site:.tas.gov.au AND (\"energy resilience\" OR \"energy sustainability\") AND (governance) filetype:pdf",

"Victoria": "site:.vic.gov.au AND (\"energy resilience\" OR \"energy sustainability\") AND (governance) filetype:pdf",

"New South Wales": "site:.nsw.gov.au AND (\"energy resilience\" OR \"energy sustainability\") AND (governance) filetype:pdf"

}

def create_serpapi_client(query):

params = {

"engine": "google",

"q": query,

"api_key": api_key,

"num": 10,

"start": 0 # Start from the first page

}

return GoogleSearch(params)

**Stage 2: Fetch Results and Print the First Two**

In this function, we'll fetch results and print the first two for each domain.

def fetch_results(client, start):

client.params_dict["start"] = start

search = client.get_dict()

return search.get("organic_results", [])

**Stage 3: Save Results to CSV File**

This function saves the results to a CSV file, as specified earlier.

import os

import csv

def save_to_csv(data, filepath):

os.makedirs(os.path.dirname(filepath), exist_ok=True)

file_exists = os.path.isfile(filepath)

with open(filepath, mode='a', newline='', encoding='utf-8') as file:

writer = csv.writer(file)

if not file_exists:

writer.writerow(['Title', 'Link', 'Snippet'])

for entry in data:

writer.writerow([entry.get('title'), entry.get('link'), entry.get('snippet')])

**Stage 4: Print Environment Output for First Two Results**

This function prints the first two results for each domain.

def print_first_two_results(results, domain_name):

print(f"{domain_name} Results (1st 2nd {domain_name} results):")

print("—" * 30)

for i, result in enumerate(results[:2], start=1):

title = result.get('title', 'No Title')

link = result.get('link', 'No Link')

snippet = result.get('snippet', 'No Snippet')

print(f"Result {i}:")

print(f"Title: {title}")

print(f"Link: {link}")

print(f"Snippet: {snippet}")

print("—" * 30)

**Stage 5: Main Script to Retrieve, Save, and Print Results**

This function will iterate over each domain, fetch results, print the first two, and save the entire result set.

def retrieve_save_and_print_results(api_key, domains, base_dir):

for domain_name, query in domains.items():

client = create_serpapi_client(query)

start = 0

filepath = os.path.join(base_dir, f"{domain_name}_Grey_Lit_Results.csv")

print(f"Starting retrieval for: {domain_name}")

# Retrieve first page of results for preview and saving

results = fetch_results(client, start)

# Print the first two results

print_first_two_results(results, domain_name)

# Continue saving all results

all_results = []

while results:

entries = []

for result in results:

title = result.get('title', 'No Title')

link = result.get('link', 'No Link')

snippet = result.get('snippet', 'No Snippet')

entries.append({"title": title, "link": link, "snippet": snippet})

save_to_csv(entries, filepath)

start += 10

results = fetch_results(client, start) # Fetch next page

print(f"Completed retrieval for {domain_name}\n")

print("All results retrieved, saved, and first two results printed for each domain.")

**Complete Script**

Here’s the full script that integrates all stages.

import os

import csv

from serpapi import GoogleSearch

# Constants

API_KEY = 'YOUR_API_KEY'

BASE_DIR = "**Left blank (removed)**"

# Define domains for search

domains = {

"Tasmania": "site:.tas.gov.au AND (\"energy resilience\" OR \"energy sustainability\") AND (governance) filetype:pdf",

"Victoria": "site:.vic.gov.au AND (\"energy resilience\" OR \"energy sustainability\") AND (governance) filetype:pdf",

"New South Wales": "site:.nsw.gov.au AND (\"energy resilience\" OR \"energy sustainability\") AND (governance) filetype:pdf"

}

# Create a SerpAPI client

def create_serpapi_client(query):

params = {

"engine": "google",

"q": query,

"api_key": API_KEY,

"num": 10,

"start": 0

}

return GoogleSearch(params)

# Fetch results from SerpAPI

def fetch_results(client, start):

client.params_dict["start"] = start

search = client.get_dict()

return search.get("organic_results", [])

# Save results to CSV

def save_to_csv(data, filepath):

os.makedirs(os.path.dirname(filepath), exist_ok=True)

file_exists = os.path.isfile(filepath)

with open(filepath, mode='a', newline='', encoding='utf-8') as file:

writer = csv.writer(file)

if not file_exists:

writer.writerow(['Title', 'Link', 'Snippet'])

for entry in data:

writer.writerow([entry.get('title'), entry.get('link'), entry.get('snippet')])

# Print first two results for each domain

def print_first_two_results(results, domain_name):

print(f"{domain_name} Results (1st 2nd {domain_name} results):")

print("—" * 30)

for i, result in enumerate(results[:2], start=1):

title = result.get('title', 'No Title')

link = result.get('link', 'No Link')

snippet = result.get('snippet', 'No Snippet')

print(f"Result {i}:")

print(f"Title: {title}")

print(f"Link: {link}")

print(f"Snippet: {snippet}")

print("—" * 30)

# Main function to retrieve, save, and print results

def retrieve_save_and_print_results():

for domain_name, query in domains.items():

client = create_serpapi_client(query)

start = 0

filepath = os.path.join(BASE_DIR, f"{domain_name}_Grey_Lit_Results.csv")

print(f"Starting retrieval for: {domain_name}")

# Fetch and print first two results for preview

results = fetch_results(client, start)

print_first_two_results(results, domain_name)

# Continue saving all results

while results:

entries = []

for result in results:

title = result.get('title', 'No Title')

link = result.get('link', 'No Link')

snippet = result.get('snippet', 'No Snippet')

entries.append({"title": title, "link": link, "snippet": snippet})

save_to_csv(entries, filepath)

start += 10

results = fetch_results(client, start) # Fetch next page

print(f"Completed retrieval for {domain_name}\n")

print("All results retrieved, saved, and first two results printed for each domain.")

# Run the tool

retrieve_save_and_print_results()

**Notes**

- Replace 'YOUR_API_KEY' with the actual SerpAPI key.
- Each domain’s first two results are printed in the specified format with em-dashes separating entries.
